# Supplementary material
Source: publisher figshare collection journal article supplement (https://gsapubs.figshare.com/ndownloader/files/39498298)
Supplement: Supplementary file 1 [file 39498298]

| t2 (Ma) | t1 (Ma) | dT (°C) | uncert  +/- (°C) | denud (m) | uncert.  +/- (m) | denud rate (m/Ma) | uncert  +/- (°C) |
| --- | --- | --- | --- | --- | --- | --- | --- |
| 250 | 200 | 10 | 60 | 400 | 2400 | 8 | 34 |
| 200 | 145 | -30 | 38 | -1200 | 1500 | -22 | 25 |
| 145 | 100 | 50 | 25 | 2000 | 1000 | 44 | 11 |
| 100 | 65 | 10 | 26 | 400 | 1050 | 11 | 26 |
| 65 | 23 | -3 | 19 | -120 | 750 | -3 | 25 |
| 23 | 0 | 0 | 20 | 0 | 800 | 0 | 24 |

TABLE S6. INCREMENTAL DENUDATION
